# Supplementary material
Source: PubMed Central journal article supplement (PMC2670867)
Supplement: emboj200939s1.pdf [file emboj200939s1.pdf]

## Supplementary Materials and methods

### *Construction of vector*

For the construction of *DsRed*-fused *OsNAC4* expression vector, *OsNAC4* coding sequence was PCR-amplified from rice cDNA and amplified fragments were cloned into a pGEM-T plasmid vector (Promega, Madison, WI). The *DsRed* coding sequence was amplified by PCR, and the amplified fragments were digested with *SpeI* and *BamHI* and cloned in-frame into the *SpeI* and *BamHI* sites of the pGEM-T vector contained with *OsNAC4* gene. The plasmid was further digested with *BamHI* and cloned into the *BamHI* site of the expression vector *pAHC17*.

To obtain *NES*-fused *OsNAC4* expression vector, *NES* sequence (Leu-54 to Gln-69) in *OsNAPI* (AJ438611) was synthesized by DNA synthesizer (Applied Biosystems, Foster City, CA), (5'-CTCTCCCCCAATGTCAGGAAGCGTGTCTCGAATATTTGAGGGAGATCCAG-3') and PCR-amplified using one set of specific primers, (5'-ATGCTCTCCCCCAATGTCAGGAA-3', 5'-CTGGATCTCCCTCAAATATT). Amplified fragment was cloned in-frame into *OsNAC4-DsRed* vector.

For cell death detection in protoplasts using Evans blue dye, protoplasts were transformed with appropriate expression vectors using PEG-mediated transformation method. After cultivation for 12 or 24 h at 30°C, all protoplasts were incubated for 15 min with 0.05% Evans blue containing KMC solution (117 mM KCl, 82 mM MgCl<sub>2</sub>, and 85 mM CaCl<sub>2</sub>) then washed extensively to remove the excess dye. The number of dead protoplasts and survived protoplasts were determined by counting under light microscopy within fifty individual fields (Takai et al., 2006).

### *Transmission electron microscopy (TEM)*

Cultured cells were fixed with 2.5% glutaraldehyde containing 0.05 M sodium cacodylate (pH 7.0) for 2 h at 4°C and then washed with 0.05 M sodium cacodylate (pH 7.0). The cells were post-fixed with 1% OsO<sub>4</sub> for 2 h on ice. After washing with water, the cells were dehydrated in a graded acetone series. The dehydrated cells were embedded in Spurr's resin (TAAB Lab., Aldermaston, UK) and sectioned. Ultra-thin sections were stained with lead (Reynolds 1963) and observed under a transmission electron microscope (H-7100, Hitachi, Tokyo, Japan) at an accelerating voltage of 75 kV.

### ***Immunogold electron microscopy***

To examine OsNAC4 distribution by immunogold electron microscopy, we fixed cultured rice cells with 0.6% glutaraldehyde and 4% paraformaldehyde in a 0.05 M sodium cacodylate buffer (pH 7.4) for 5 min at 4°C under a vacuum. After storage at 4°C for 1 h, tissues were rinsed with a 0.05 M sodium cacodylate buffer (pH 7.4) for 2 h at 4°C. Fixed materials were dehydrated with an ethanol series at 4°C, embedded in LR White resin (The London Resin Co., London, UK), and polymerized using UV irradiation at room temperature. Ultrathin sections were cut with a diamond knife and mounted on uncoated nickel grids. Prior to incubation in primary antibody, sections were blocked with 1% BSA and 1% goat serum in PBS for 30 min at room temperature. We diluted a rabbit antibody specific for OsNAC4 in PBS supplemented with 1% goat serum. Samples were incubated with primary antibody overnight at 4°C, followed by washing in 0.05% Tween 20 in PBS (PBST, pH 7.4). Sections were then incubated in secondary antibody, a goat anti-rabbit IgG conjugated to 15 nm gold particles (Biocell Research Laboratories, Cardiff, UK) and diluted in PBST, for 90 min at room temperature. Sections were then washed sequentially in PBST and distilled water, followed by staining with uranyl acetate for 20 min. Sections were observed using a transmission electron microscope (H-7100; Hitachi, Tokyo, Japan) at an accelerating voltage of 75 kV.

### ***Protoplast preparation and gene transformation***

Rice protoplasts were isolated from cultured Oc rice cells. After four days of culture, cells were harvested, and protoplasts were isolated as described previously (Takai et al., 2006). Cultured rice cells was digested in an enzyme solution containing 1.0% (w/v) cellulase “Onozuka” RS (Yakult, Tokyo, Japan), 0.5% (w/v) macerozyme R10 (Yakult), 0.1% (w/v) pectolyase Y23 (Kyowa Chemical Products, Osaka, Japan), 0.6 M mannitol, 5 mM MES-KOH (pH 5.7), 10 mM CaCl<sub>2</sub>, and 0.1% (w/v) BSA (bovine serum albumin) at 30°C for 2-3 h without shaking. Protoplasts were separated from undigested cell clumps by filtration using a 100 µm cell strainer and collected by centrifugation at 80g for 3 min at room temperature. The protoplasts were gently resuspended and washed twice in KMC solution (117 mM KCl, 82 mM MgCl<sub>2</sub>, and 85 mM CaCl<sub>2</sub>). The protoplast concentration was quantified using a hemocytometer and a light microscope. Almost all protoplasts were observed in their usual healthy and round shape. Before PEG-mediated transformation, the protoplasts were centrifuged and resuspended at  $2 \times 10^5$  cells/ml in MMg solution (0.3 M

mannitol, 15 mM MgCl<sub>2</sub>, and 4 mM MES-KOH, pH 5.7). The protoplast suspension (0.2 ml, 4 x 10<sup>4</sup> cells) was mixed with ~20 µl of the DNA solution. An equal volume of PEG solution (40 % (v/v) PEG 4000 (Fluka, Buchs, Switzerland), 0.2 M mannitol, and 0.1 M CaCl<sub>2</sub>) was added and gently mixed. After incubating 10 min at room temperature, protoplasts were diluted with 0.8 ml of KMC solution and centrifuged at 80g for 3 min at room temperature. After removing the supernatant, the protoplasts were suspended in 0.2 ml KMC solution and incubated for 16 h at 30°C before assaying.

### ***Nuclei purification and immunoblot analysis***

Rice protoplasts were transformed with each suitable vector and cultured for 12 or 24 h at 30°C. Transformed protoplasts were broken by resuspension in a burst buffer (5 mM MES pH5.6, 5mM MgCl<sub>2</sub>, 10 mM KCl, 0.4% (w/v) Triton X-100, 0.35 M sucrose, 20% (w/v) glycerol, 1 x Roche proteinase inhibitor, 5 mM 2-mercaptoethanol). Nuclei were separated from cytosol fraction by filtration using a 70 µm cell strainer and collected by centrifugation at 3,500g for 5 min at 4°C. Isolated nuclei was washed by washing buffer containing 5 mM MES pH5.6, 5mM MgCl<sub>2</sub>, 10 mM KCl, 0.35 M sucrose, 20% (w/v) glycerol, 1 x Roche proteinase inhibitor, 5 mM 2-mercaptoethanol and collected by centrifugation at 2,000g for 5 min. Nuclear protein was extracted by resuspension in isolation buffer (50 mM HEPES-KOH pH 8.0, 1% SDS, 2 mM EDTA, 1 mM DTT).

To generate the specific anti-OsNAC4 antibody, the C-terminal region of OsNAC4, encompassing the region from His-201 to Phe-318, was cloned in-frame into the pET-28(a)+ vector (Novagen, Madison, WI). The resulting His tag fusion protein was overproduced in the BL21 (DE3) strain of *E. coli* (Novagen) and purified using a HisTrap Kit according to the manufacturer's protocol (GE Healthcare). The purified recombinant protein (10 mg) was used to immunize rabbits. Antiserum was further purified by affinity chromatography with a HiTrap N-hydroxysuccinimide-activated column coupled to recombinant OsNAC4.

Isolated nuclear fraction and cytosol fraction were separated by SDS-polyacrylamide gels (12.5%). Separated proteins were electrophoretically transferred to a nitrocellulose membrane (Millipore, Bedford, USA) with a Bio-Rad semidry blotter (Bio-Rad). Nonspecific binding was blocked with 3% BSA in PBS buffer for 1 h at room temperature. Immunoreactive polypeptides were detected using a peroxidase-conjugated goat antibody raised against rabbit IgG (Medical & Biological Laboratories, Nagoya, Japan) and visualization was performed with an enhanced immunochemiluminescence kit (ECL-plus, GE Healthcare) and

chemiluminescence was detected by LAS-1000 (Fujifilm, Tokyo, Japan). Phosphorylated OsNAC4 was detected using phosphoserine antibody (ab6639) (Abcam, Cambridge, UK). The purity of the isolated nuclei and cytosol were analyzed by Western blotting using an anti-histon H3 antibody (nucleus-specific antibody) and an anti-OsUSP antibody (cytosol-specific antibody).

### ***Immunoprecipitation***

Isolated cytosol and nuclei fractions were passed through a NAP-5 column (GE Healthcare) equilibrated with binding buffer (20 mM HEPES-KOH, pH 8.0, 15 mM Sucrose, 35 mM KCl, 15 mM NaCl, 4 mM MgCl<sub>2</sub>, 0.2 mM DTT, 0.2 mM EDTA, 0.1% Triton X-100). To test for any non-specific binding of proteins to Protein A-sepharose (GE Healthcare), the cytosol and nuclei fractions were mixed with Protein A-sepharose by shaking for 1 h at 4°C. Following pre-mixing, Protein A-sepharose was removed by centrifugation at 500g for 5 min. Anti-OsNAC4 antibody were added to the supernatant solution and incubated for 6 h, followed by the addition of Protein A-sepharose and incubation for an additional 1 h at 4°C. Treated samples were then centrifuged at 3,000g for 1 min to yield protein A-sepharose precipitated portions. The protein A-sepharose precipitates were further washed with binding buffer three times for removing any non-specific protein binding, resuspended in 30 µl Laemmli sample buffer and boiled at 95 for 5 min to collect for interacted proteins. Equal quantities of protein samples were loaded on SDS-PAGE gel and analyzed by immunoblotting.

### ***Quantitative real-time RT-PCR***

Quantitative real-time RT-PCR was performed on an Opticon2 (Bio-Rad, Hercules, CA) using a QuantiTect SYBR Green RT-PCR Kit (QIAGEN) with the following gene-specific primers. *OsNAC4*: forward, 5'-GGTGAAGGAGGACAACGACT-3' and reverse, 5'-TCAGAATGGTGGCAGGATTGT-3'. *OsHSP90*: forward, 5'-CAGGGCAGAAGGACATCTTTT-3' and reverse, 5'-CGTCAACAGGGTCAGTGAAG-3'. *IREN*: forward, 5'-CTGCCAGGCACTTTGTCAGT-3' and reverse, 5'-TCTTGGCTGCAGCATGTAGG-3'. To eliminate DNA contamination during qRT-PCR, all primer sets used for real-time RT-PCR were designed across an intron. The sizes of the PCR products were checked to confirm that only products from mRNA were amplified in all real-time RT-PCR experiments. The fluorescence data produced sigmoidal amplification plots

in which the number of cycles was plotted against fluorescence. Quantification of each mRNA was calculated with calibration curve which was prepared using standard gene of known template amounts (1 ng-0.1 pg) and corrected with reference data of *Act-1* gene.

### ***22K oligo array data analysis***

We used a long oligonucleotide array (60-mer; Agilent Technologies, 22K) designed by the Institute for Genomic Research from tentative consensus sequences. RNA was isolated from controls cell lines and those expressing an *OsNAC4*-specific RNAi in three independent transformation experiments. cRNAs were synthesized from 8.25 mg total RNA for each replicate using an T7 primer and labeled by the Cy3 or Cy5 dyes. Microarrays were scanned using a scanning laser microscope (model ScanArray4000XL; GSI Lumonics, Billerica, MA, USA). Separate images were acquired for each fluorescence at a resolution of 10  $\mu\text{m}$  per pixel. We used ArrayVision 5.1 (Amersham) and GeneSpring GX 7.3 (Silicon Genetics, Redwood, CA, USA) software for microarray data analysis. Local background fluorescence was subtracted from the value assigned to each spot on the array. Spots obscured by dust particles, missing spots, spots with low signal intensity, and spots with high local background fluorescence were flagged for exclusion after further analysis. Normalization between the Cy3 and Cy5 emission channels was achieved by calculating the ratio of the total Cy3 signal intensity from all spots in relation to the total Cy5 signal intensity from all spots.

## Supplementary Figure legends

**Figure S1** Immuno blot analysis of OsNAC4 in rice cultured cells using the specific anti-OsNAC4 antibody. Lane 1, 5 µg of total cell extract proteins; lane 2, 10 µg of total cell extract proteins; lane 3, 20 µg of total cell extract proteins; lane 4, 30 µg of total cell extract proteins. The C-terminal region of OsNAC4, encompassing the region from His-201 to Phe-318, was cloned in-frame into the pET-28(a)+ vector. The resulting His tag fusion protein was overproduced in the BL21 (DE3) strain of *E. coli* and purified using a HisTrap Kit. The purified recombinant protein (10 mg) was used to immunize rabbits. Antiserum was further purified by affinity chromatography with an OsNAC4-coupled HiTrap NHS-activated sepharose column.

**Figure S2** H<sub>2</sub>O<sub>2</sub> generation in OsNAC4-RNAi line, NR2-2 (open circle) and control line (solid circle) after treatment with flagellin (0.5 µM) from the avirulent N1141 strain. H<sub>2</sub>O<sub>2</sub> generation was analyzed by luminol-chemiluminescence. Each data point represents the average of three independent experiments. Bars indicate the standard errors.

**Figure S3** Functional Categories of 139 genes. **(A)** Classification of genes whose expression is differed in *OsNAC4* knock-down line and control line following the HR-cell death induction. Ratios of *OsNAC4* knock-down line to control line gene expressions were obtained from microarray experiments. Numbers represent groups of genes with unknown function (1), and those involved in metabolism (2), transcription (3), cellular communication/signal transduction (4), cellular transport and transport mechanisms (5), protein destination (6), cell rescue, defense, cell death and ageing (7), cell growth, cell division and DNA synthesis (8), protein synthesis (9), development (10), and cellular organization (11). **(B)** Predicted topology of IREN. Hashed bar indicates endonuclease domain, and filled bar indicates EF-hand motif.

**Figure S4** Exogenous expression of OsNAC4 in *Nicotiana benthamiana* leaves by viral transduction. Full length of OsNAC4 were subcloned into *TogJ* vector and the vector template DNA was linearized with *MluI* prior to in vitro transcription to make a run-off transcription. The in vitro transcription reaction was performed with linearized vector

DNA using T7 RNA polymerase. The transcripts were inoculated to six-week old *N. benthamiana* with carborundum. Seven days after inoculation, lesions resulted from HR cell death were observed in left leaf. Right leaf is control leaf transfected by empty *TogJ* vector

**Figure S5** Model for HR cell death induced by OsNAC4.

Figure S1  
Kaneda et al.

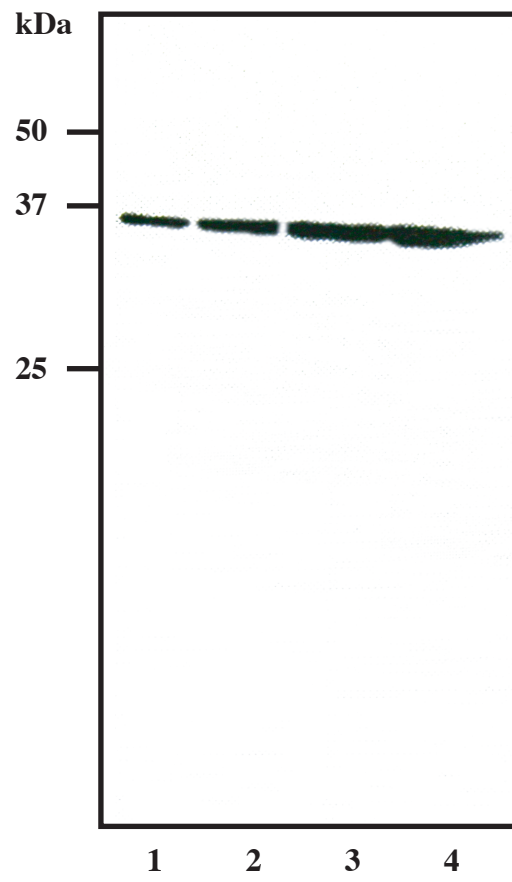



Figure S2  
Kaneda et al.

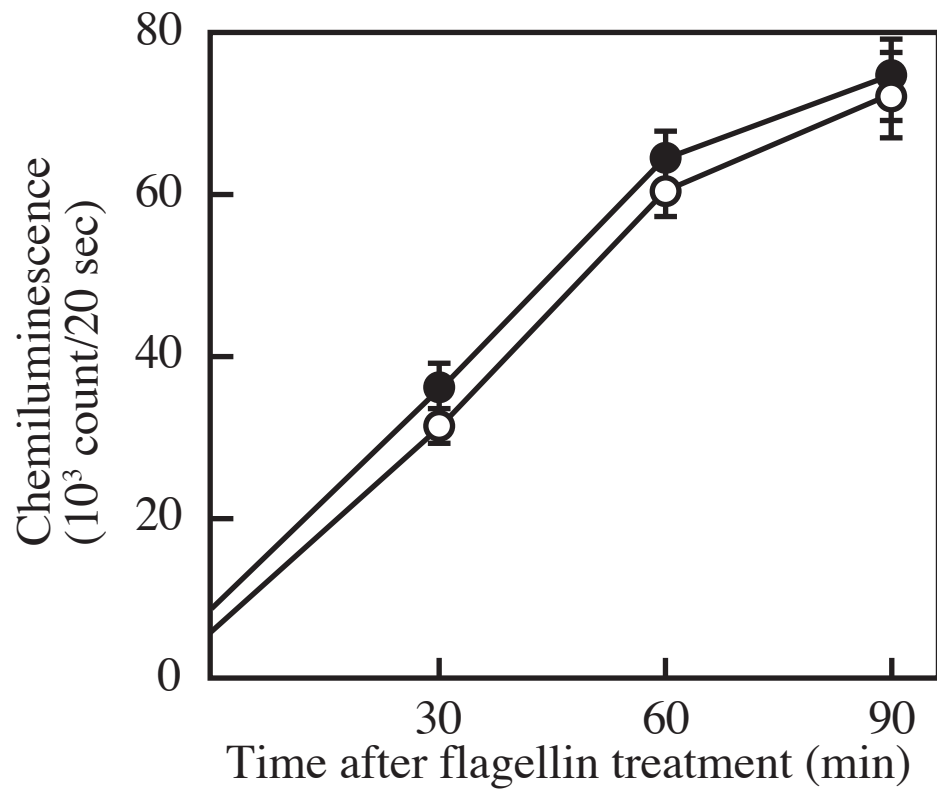

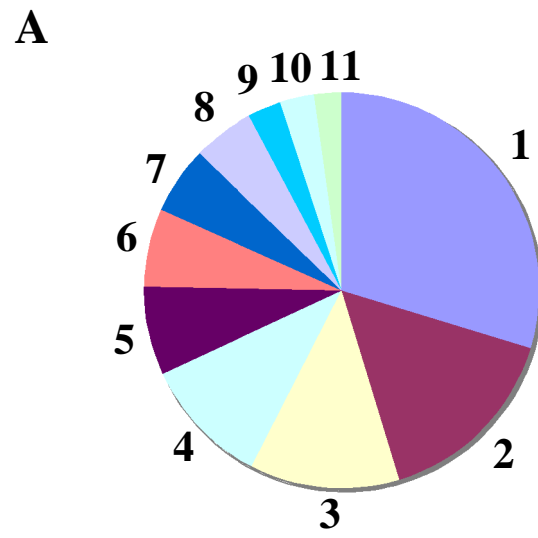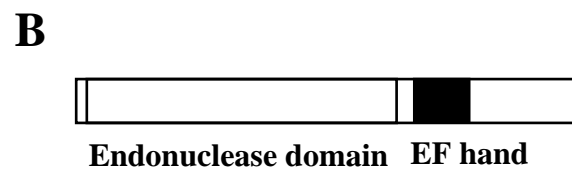

Figure S4  
Kaneda et al.

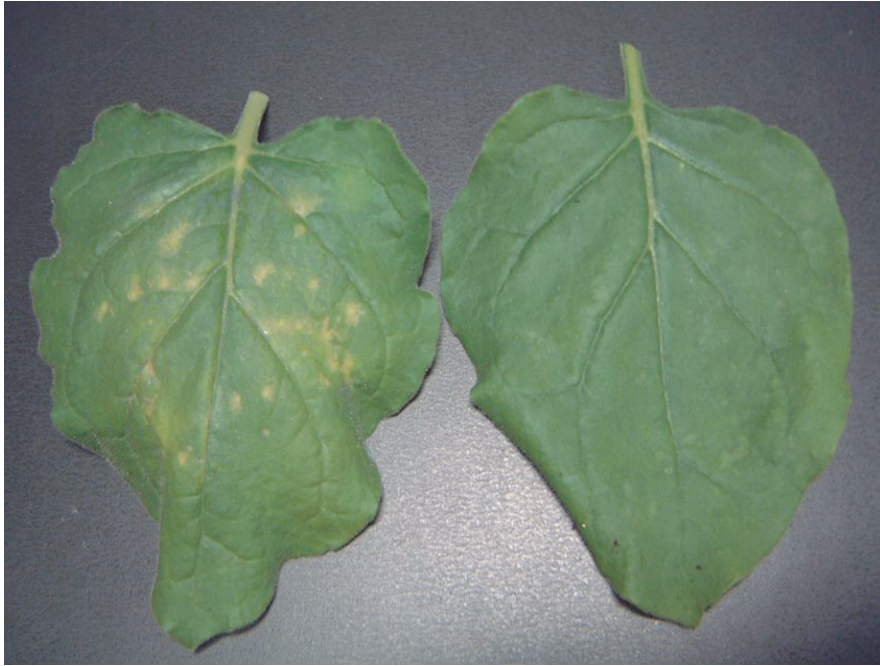

Figure S5  
Kaneda et al.

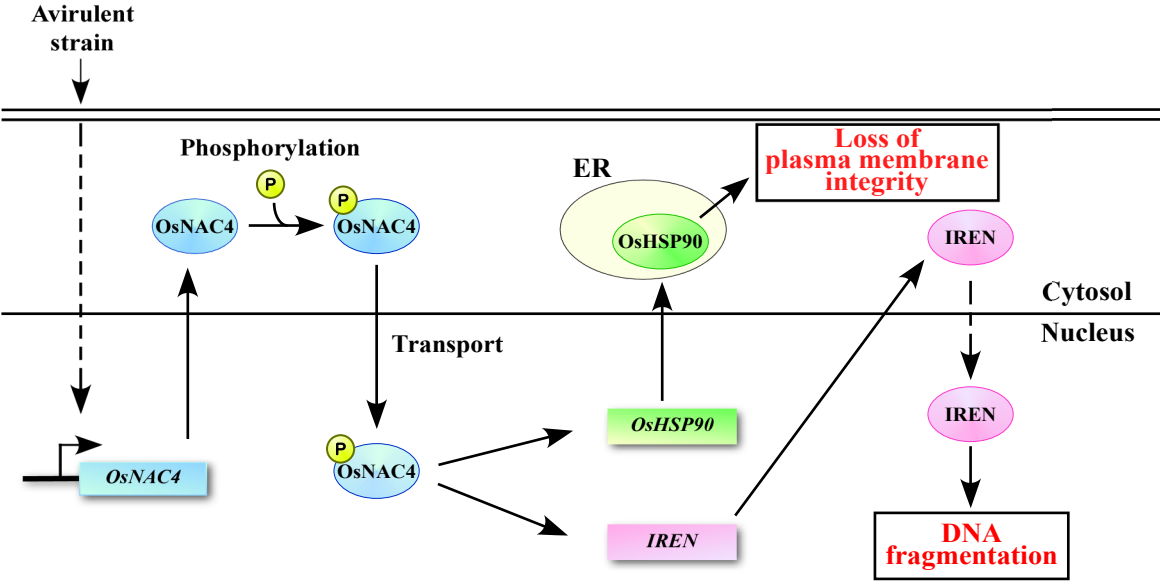

**Table S1. Differentially expressed transcripts between cultured rice cells and OsNAC4 RNAi line, NR2-4, inoculated with the incompatible N1141 at different time points.**

| Accession | Putative gene identification                   | NR2-4 line |      |      |      | Wild type |      |       |        |
|-----------|------------------------------------------------|------------|------|------|------|-----------|------|-------|--------|
|           |                                                | 0          | 1    | 3    | 6    | 0         | 1    | 3     | 6 (hr) |
| AK060274  | Putative UDP-galactose/UDP-glucose transporter | 0.95       | 0.87 | 1.03 | 1.44 | 1.12      | 1.42 | 8.27  | 5.24   |
| AK063898  | Hypothetical protein                           | 0.88       | 0.64 | 1.50 | 1.01 | 0.86      | 2.51 | 7.96  | 7.47   |
| AK065588  | Putative CBL-interacting protein kinase        | 0.97       | 0.74 | 0.99 | 1.08 | 0.94      | 1.27 | 4.97  | 6.73   |
| AK058409  | Putative arm repeat-containing protein         | 0.88       | 0.93 | 0.90 | 1.25 | 0.97      | 1.27 | 3.70  | 5.46   |
| AK067860  | Hypothetical protein                           | 0.94       | 0.96 | 1.06 | 1.38 | 1.10      | 1.51 | 6.50  | 6.34   |
| AK100148  | Hypothetical protein                           | 0.83       | 1.11 | 1.27 | 1.04 | 0.93      | 1.30 | 5.75  | 5.85   |
| AK103383  | Actin-like protein 3                           | 1.02       | 0.93 | 1.07 | 1.15 | 0.92      | 1.53 | 4.91  | 4.13   |
| AK064143  | BTB/TAZ domain protein                         | 0.91       | 0.80 | 1.34 | 1.20 | 1.19      | 1.27 | 8.02  | 13.48  |
| AK058319  | Polyubiquitin.                                 | 0.80       | 0.91 | 1.07 | 1.16 | 0.94      | 2.02 | 3.71  | 3.14   |
| AK100224  | Putative ubiquitin.                            | 1.07       | 0.99 | 1.04 | 1.48 | 1.01      | 1.60 | 3.25  | 2.46   |
| AK072505  | Serine/threonine protein kinase.               | 0.92       | 1.02 | 2.18 | 1.03 | 1.29      | 1.46 | 5.35  | 6.38   |
| AK066397  | Receptor protein kinase                        | 0.83       | 1.28 | 1.34 | 0.67 | 0.96      | 1.88 | 11.29 | 5.72   |
| AK063871  | Putative UDP-glucose 4-epimerase.              | 0.85       | 1.03 | 1.10 | 1.31 | 1.07      | 1.70 | 4.96  | 2.92   |
| AK063428  | Aluminum-activated malate transporter          | 0.67       | 0.95 | 1.14 | 0.84 | 0.85      | 1.49 | 8.90  | 17.25  |
| AK106226  | Hypothetical protein                           | 0.97       | 0.83 | 0.89 | 1.51 | 0.90      | 1.35 | 3.13  | 3.55   |
| AK060598  | Transmembrane amino acid transporter protein   | 1.03       | 0.94 | 0.65 | 0.50 | 1.01      | 1.30 | 7.85  | 8.02   |
| AK064554  | Lipase-like protein.                           | 0.90       | 1.05 | 0.96 | 1.36 | 1.00      | 1.13 | 6.50  | 7.35   |
| AK062718  | Hypothetical protein                           | 0.96       | 1.07 | 1.04 | 1.60 | 1.05      | 1.42 | 7.48  | 4.88   |
| AK070399  | Hypothetical protein                           | 1.20       | 1.16 | 1.18 | 1.05 | 1.01      | 1.95 | 4.76  | 4.98   |
| AK064074  | LEA protein.                                   | 1.80       | 0.48 | 1.20 | 1.01 | 1.12      | 0.89 | 8.86  | 8.15   |
| AK069950  | Hypothetical protein                           | 0.83       | 1.26 | 1.12 | 1.12 | 1.05      | 1.36 | 4.66  | 4.37   |
| AK060275  | Proline-rich protein                           | 1.30       | 0.75 | 1.26 | 1.31 | 0.97      | 1.24 | 4.46  | 3.85   |
| AK099485  | Hypothetical protein                           | 0.89       | 1.01 | 1.11 | 1.42 | 0.88      | 1.81 | 3.10  | 3.02   |
| AK071729  | Hypothetical protein                           | 0.88       | 1.10 | 1.24 | 0.90 | 1.22      | 1.38 | 6.69  | 8.71   |
| AK065831  | Putative regulatory protein.                   | 1.16       | 0.98 | 1.04 | 1.28 | 1.29      | 1.72 | 6.43  | 5.14   |
| AK059734  | Type A response regulator 6.                   | 0.81       | 0.91 | 0.86 | 0.52 | 1.16      | 1.35 | 6.91  | 8.24   |
| AK109040  | Protein kinase-like.                           | 1.11       | 1.12 | 1.30 | 1.14 | 1.11      | 2.24 | 6.99  | 4.79   |

|          |                                                     |      |      |      |      |      |      |       |       |
|----------|-----------------------------------------------------|------|------|------|------|------|------|-------|-------|
| AK100514 | Endonuclease, putative.                             | 0.97 | 1.11 | 0.95 | 0.93 | 0.98 | 1.11 | 4.17  | 4.62  |
| AK061327 | Transferase family                                  | 0.91 | 1.01 | 1.11 | 1.21 | 1.07 | 1.23 | 7.78  | 17.22 |
| AK109902 | Putative trehalose-6-phosphate phosphatase          | 0.69 | 1.11 | 0.87 | 0.87 | 1.20 | 1.27 | 8.56  | 11.08 |
| AK109325 | Putative nuclear protein.                           | 1.04 | 0.81 | 1.64 | 1.83 | 1.29 | 1.10 | 9.04  | 10.84 |
| AK102478 | Heat shock protein 90.                              | 0.97 | 1.00 | 0.90 | 1.07 | 1.03 | 1.29 | 5.71  | 3.85  |
| AK105877 | Putative AP2-domain DRE binding factor              | 1.21 | 1.04 | 0.98 | 1.03 | 1.12 | 1.84 | 3.52  | 3.06  |
| AK102970 | Putative antifungal thaumatin-like protein          | 0.91 | 0.80 | 0.83 | 1.54 | 0.99 | 1.34 | 3.30  | 4.43  |
| AK103071 | Retrotransposon protein,                            | 1.20 | 0.84 | 1.30 | 1.59 | 1.16 | 1.68 | 6.44  | 5.90  |
| AK100379 | GCIP-interacting family protein-like.               | 1.40 | 1.17 | 1.59 | 1.68 | 1.01 | 2.45 | 6.83  | 4.75  |
| AK063625 | Caleosin                                            | 1.85 | 0.45 | 0.75 | 0.75 | 0.89 | 0.88 | 6.88  | 12.54 |
| AK070672 | Hypothetical protein                                | 0.84 | 1.09 | 1.16 | 1.44 | 1.07 | 1.33 | 6.47  | 5.44  |
| AK065743 | Putative dnaK-type molecular chaperone              | 1.05 | 0.86 | 0.92 | 1.37 | 1.04 | 1.48 | 9.09  | 6.37  |
| AK103321 | Hypothetical protein                                | 1.16 | 1.03 | 0.79 | 0.62 | 0.78 | 3.16 | 5.96  | 6.93  |
| AK061174 | Putative harpin inducing protein.                   | 1.12 | 1.10 | 0.90 | 0.77 | 0.92 | 1.52 | 5.35  | 2.81  |
| AK067056 | Hypothetical protein                                | 0.82 | 1.21 | 1.16 | 1.96 | 0.97 | 4.06 | 6.04  | 11.56 |
| AK101170 | Phosphate transporter - HvPT4                       | 1.17 | 0.81 | 0.80 | 1.28 | 0.68 | 3.65 | 8.10  | 7.56  |
| AK107893 | Hypothetical protein                                | 1.44 | 1.12 | 0.90 | 1.68 | 1.20 | 1.43 | 10.49 | 13.03 |
| AK104746 | Aldehyde dehydrogenase                              | 1.25 | 1.16 | 1.16 | 1.87 | 0.99 | 1.93 | 8.29  | 12.21 |
| AK107530 | Hypothetical protein                                | 0.80 | 0.91 | 1.04 | 1.50 | 1.15 | 4.46 | 22.04 | 26.48 |
| AK063715 | ZF-HD protein dimerisation region                   | 1.22 | 0.93 | 1.09 | 1.46 | 0.82 | 2.04 | 11.85 | 12.70 |
| AK058426 | Thioredoxin-like 1.                                 | 1.35 | 1.26 | 1.29 | 1.50 | 1.09 | 1.98 | 6.80  | 7.15  |
| AK060392 | Remorin, C-terminal region,                         | 1.30 | 0.91 | 1.61 | 1.36 | 1.18 | 2.43 | 8.35  | 10.74 |
| AK071968 | Putative choline kinase CK2.                        | 1.09 | 0.95 | 1.64 | 1.49 | 0.93 | 3.10 | 15.05 | 13.14 |
| AK065194 | Hypothetical protein                                | 1.18 | 1.01 | 1.13 | 1.87 | 0.92 | 3.28 | 7.63  | 10.25 |
| AK111746 | Putative CBL-interacting protein kinase             | 1.12 | 1.03 | 1.98 | 1.91 | 0.98 | 2.47 | 17.51 | 9.92  |
| AK070177 | Putative mannose-6-phosphate isomerase              | 1.08 | 1.07 | 0.95 | 0.89 | 0.94 | 6.05 | 10.69 | 13.01 |
| AK099079 | Putative glucose transport protein STP1             | 1.13 | 1.16 | 1.42 | 1.72 | 1.06 | 2.91 | 11.26 | 20.67 |
| AK065989 | Putative NAM protein                                | 1.15 | 0.97 | 1.29 | 1.57 | 1.04 | 2.00 | 6.85  | 7.08  |
| AK073507 | Putative serine/threonine-specific receptor protein | 1.08 | 1.16 | 1.54 | 1.66 | 1.00 | 2.62 | 4.80  | 5.22  |
| AK111294 | Hypothetical protein                                | 1.35 | 1.35 | 1.58 | 1.52 | 1.23 | 2.50 | 10.21 | 3.31  |
| AK065329 | Hypothetical protein                                | 0.97 | 1.19 | 1.30 | 1.56 | 0.86 | 2.63 | 6.25  | 5.22  |
| AK107983 | Hypothetical protein                                | 1.04 | 1.21 | 1.45 | 1.53 | 0.92 | 3.24 | 6.63  | 5.66  |

|          |                                                |      |      |      |      |      |       |       |       |
|----------|------------------------------------------------|------|------|------|------|------|-------|-------|-------|
| AK065359 | Lustrin A-like.                                | 1.27 | 1.01 | 1.51 | 1.78 | 1.06 | 3.32  | 8.17  | 5.11  |
| AK108304 | NHL repeat-containing protein-like.            | 0.87 | 0.89 | 1.56 | 1.46 | 0.94 | 2.59  | 4.63  | 5.98  |
| AK060684 | Putative myb-related protein                   | 0.95 | 1.08 | 1.36 | 1.48 | 0.89 | 2.79  | 4.69  | 3.67  |
| AK107964 | Hypothetical protein                           | 0.99 | 1.06 | 1.47 | 1.73 | 1.14 | 2.30  | 4.06  | 4.07  |
| AK100767 | Alcohol dehydrogenase                          | 0.74 | 1.08 | 0.70 | 1.35 | 0.66 | 14.70 | 7.74  | 9.05  |
| AK101103 | Putative beta-ketoacyl-CoA synthase.           | 0.97 | 0.99 | 1.18 | 1.42 | 0.99 | 2.37  | 3.53  | 3.21  |
| AK107989 | Ethylene-responsive element binding protein    | 1.02 | 1.69 | 1.95 | 1.82 | 1.04 | 13.90 | 34.30 | 7.72  |
| AK105596 | Putative NAC domain protein NAC1.              | 1.13 | 1.20 | 1.44 | 1.91 | 0.89 | 6.03  | 7.62  | 5.94  |
| AK111415 | Putative chitinase.                            | 0.95 | 1.21 | 1.91 | 1.89 | 1.13 | 6.39  | 17.93 | 6.98  |
| AK068151 | Wound-induced protein                          | 1.01 | 0.94 | 0.99 | 0.99 | 1.09 | 7.35  | 6.36  | 5.32  |
| AK058853 | Enzyme of the cupin superfamily.               | 1.05 | 1.31 | 1.48 | 1.49 | 1.15 | 4.23  | 4.34  | 2.93  |
| AK109116 | Putative hydroxycinnamoyl transferase.         | 1.04 | 0.91 | 2.52 | 4.92 | 1.06 | 13.52 | 17.92 | 11.83 |
| AK064946 | BHLH protein-like.                             | 1.15 | 1.52 | 2.24 | 2.00 | 1.12 | 9.82  | 6.89  | 7.14  |
| AK100238 | Zinc finger-like.                              | 0.96 | 1.45 | 1.81 | 2.86 | 1.15 | 5.16  | 7.27  | 8.57  |
| AK072729 | Myristoyl-acyl carrier protein thioesterase    | 0.91 | 1.39 | 1.08 | 2.63 | 0.96 | 3.71  | 4.79  | 4.55  |
| AK101182 | Putative heat shock factor.                    | 1.03 | 0.98 | 1.38 | 2.64 | 0.83 | 5.43  | 4.32  | 5.05  |
| AK107493 | Sialyltransferase-like protein.                | 0.88 | 1.15 | 1.04 | 1.54 | 1.05 | 2.42  | 5.02  | 3.53  |
| AK070719 | Sialyltransferase-like protein.                | 0.96 | 1.26 | 1.10 | 1.17 | 1.03 | 5.50  | 4.07  | 2.07  |
| AK066063 | Receptor-like protein kinase                   | 1.02 | 1.32 | 1.03 | 1.79 | 0.90 | 8.10  | 5.23  | 10.62 |
| AK061011 | Hypothetical protein                           | 0.97 | 0.92 | 1.35 | 1.50 | 0.95 | 2.91  | 4.51  | 3.78  |
| AK109344 | Putative GTP-binding protein.                  | 0.84 | 0.79 | 0.94 | 0.82 | 0.99 | 1.55  | 3.04  | 1.73  |
| AK100906 | Diacylglycerol kinase 1.                       | 0.83 | 0.91 | 1.07 | 0.78 | 0.90 | 1.51  | 5.31  | 3.95  |
| AK064265 | Hypothetical protein                           | 0.81 | 0.96 | 0.95 | 1.17 | 1.08 | 2.16  | 5.02  | 2.43  |
| AK070197 | Putative cold acclimation protein              | 1.18 | 0.71 | 0.85 | 0.68 | 1.42 | 0.95  | 4.97  | 3.11  |
| AK059764 | Putative fiber protein Fb2.                    | 0.85 | 0.88 | 1.07 | 1.02 | 0.89 | 1.33  | 2.78  | 2.22  |
| AK072284 | Hypothetical protein                           | 0.87 | 0.78 | 1.09 | 0.89 | 0.94 | 1.47  | 4.20  | 2.77  |
| AK103072 | Putative elicitor inducible beta-1,3-glucanase | 1.30 | 0.49 | 0.83 | 1.32 | 0.97 | 1.89  | 2.76  | 2.26  |
| AK101596 | Hypothetical protein                           | 0.80 | 0.74 | 0.88 | 0.63 | 1.03 | 1.14  | 3.69  | 3.87  |
| AK063711 | Hypothetical protein                           | 0.76 | 0.67 | 1.05 | 0.79 | 0.78 | 0.97  | 2.87  | 2.93  |
| AK107774 | Putative oleosin.                              | 1.85 | 0.36 | 0.61 | 0.73 | 0.97 | 0.96  | 4.39  | 10.29 |
| AK069824 | Hypothetical protein                           | 0.84 | 1.00 | 1.10 | 1.22 | 1.03 | 1.39  | 3.45  | 2.66  |
| AK107760 | Putative reversibly glycosylated polype.       | 1.45 | 1.03 | 0.96 | 1.31 | 0.88 | 4.18  | 3.60  | 2.59  |

|          |                                                          |      |      |      |      |      |      |      |      |
|----------|----------------------------------------------------------|------|------|------|------|------|------|------|------|
| AK060706 | 2-hydroxyisoflavanone dehydratase                        | 0.85 | 0.81 | 0.77 | 0.90 | 0.67 | 1.97 | 3.19 | 2.57 |
| AK071777 | Putative CDP-diacylglycerol synthetase                   | 0.91 | 0.86 | 0.92 | 1.26 | 0.89 | 1.68 | 3.33 | 2.86 |
| AK069118 | Calnexin homolog precursor.                              | 0.87 | 0.84 | 0.88 | 0.91 | 1.08 | 1.11 | 3.52 | 2.01 |
| AK071527 | Putative DHHC-type zinc finger domain-containing protein | 0.99 | 0.86 | 1.12 | 1.27 | 0.89 | 2.12 | 3.12 | 2.33 |
| AK100034 | 12-oxo-phytodienoic acid reductase.                      | 1.15 | 0.70 | 1.04 | 1.00 | 0.77 | 2.41 | 5.00 | 4.39 |
| AK108264 | Hypothetical protein                                     | 0.84 | 1.08 | 0.40 | 0.58 | 1.09 | 1.39 | 4.50 | 4.14 |
| AK107295 | Hypothetical protein                                     | 0.95 | 0.88 | 1.17 | 0.78 | 0.96 | 1.74 | 4.15 | 3.89 |
| AK072910 | Membrane protein CH1-like.                               | 1.13 | 0.96 | 1.05 | 1.12 | 1.08 | 1.29 | 3.71 | 4.58 |
| AK061082 | Putative GRAS family transcription factor                | 1.06 | 0.90 | 0.99 | 1.23 | 0.87 | 2.34 | 4.06 | 4.53 |
| AK071680 | Putative purine permease.                                | 0.92 | 1.20 | 1.23 | 0.81 | 1.03 | 1.39 | 4.33 | 2.27 |
| AK062254 | Protein disulfide isomerase.                             | 0.76 | 0.91 | 0.68 | 1.00 | 0.94 | 0.87 | 4.37 | 3.45 |
| AK068075 | Ring-H2 zinc finger protein-like.                        | 0.99 | 0.87 | 1.13 | 0.93 | 0.97 | 1.62 | 5.63 | 3.52 |
| AK074014 | Putative splicing regulatory protein.                    | 0.82 | 0.97 | 0.77 | 0.73 | 0.87 | 1.46 | 4.04 | 1.86 |
| AK061872 | Putative ubiquitin.                                      | 1.11 | 1.05 | 1.08 | 1.42 | 1.12 | 1.59 | 3.38 | 2.86 |
| AK107193 | SF16 protein-like.                                       | 0.75 | 0.89 | 0.52 | 0.48 | 1.02 | 1.92 | 4.52 | 3.21 |
| AK101234 | Hypothetical protein                                     | 1.04 | 0.99 | 0.82 | 0.96 | 0.94 | 1.12 | 4.01 | 4.80 |
| AK072705 | Putative CENP-E like kinetochore protein                 | 0.91 | 1.08 | 1.07 | 1.05 | 1.01 | 2.48 | 3.78 | 2.15 |
| AK070712 | Putative calreticulin.                                   | 0.90 | 1.03 | 0.64 | 0.41 | 1.16 | 1.24 | 3.73 | 2.64 |
| AK108172 | F-box domain, putative.                                  | 0.92 | 1.07 | 1.06 | 0.51 | 1.14 | 1.46 | 3.77 | 2.12 |
| AK071151 | Oxysterol-binding protein-like.                          | 1.12 | 0.92 | 0.72 | 0.69 | 0.93 | 1.20 | 3.95 | 4.90 |
| AK073109 | Hypothetical protein                                     | 1.52 | 0.52 | 0.62 | 0.86 | 1.28 | 0.94 | 5.46 | 5.23 |
| AK100997 | Putative HSP protein.                                    | 1.02 | 0.84 | 0.85 | 0.91 | 0.91 | 0.98 | 2.91 | 2.47 |
| AK061570 | Hypothetical protein                                     | 0.86 | 1.03 | 0.84 | 0.87 | 0.82 | 2.23 | 3.54 | 3.15 |
| AK071491 | Heavy-metal-associated domain                            | 0.68 | 0.55 | 1.68 | 1.52 | 0.88 | 1.08 | 3.99 | 4.49 |
| AK109491 | Hypothetical protein                                     | 0.97 | 1.02 | 1.07 | 1.11 | 1.08 | 1.36 | 3.64 | 3.06 |
| AK063647 | Phytosulfokines 4 precursor                              | 1.39 | 0.98 | 1.45 | 2.13 | 1.15 | 1.91 | 4.12 | 3.74 |
| AK069826 | Putative regulatory protein.                             | 0.92 | 0.75 | 1.81 | 1.89 | 0.94 | 2.33 | 3.85 | 4.75 |
| AK102658 | Putative zinc finger protein.                            | 1.18 | 0.55 | 1.21 | 2.46 | 0.91 | 2.68 | 3.45 | 3.14 |
| AK065106 | Zinc finger (C3HC4-type RING finger)-like protein        | 0.83 | 0.95 | 1.08 | 1.91 | 1.13 | 1.85 | 4.38 | 7.28 |
| AK106955 | Putative serine/threonine protein kinase                 | 0.98 | 0.90 | 1.05 | 1.47 | 0.83 | 3.06 | 4.87 | 3.11 |
| AK069779 | ABA-responsive protein-like.                             | 0.85 | 0.74 | 1.04 | 1.72 | 0.74 | 1.77 | 3.72 | 3.56 |
| AK111073 | Hypothetical protein.                                    | 1.01 | 0.81 | 1.43 | 1.81 | 0.95 | 1.82 | 3.05 | 4.49 |



|          |                                              |      |      |      |      |      |      |       |       |
|----------|----------------------------------------------|------|------|------|------|------|------|-------|-------|
| AK106276 | F-box protein-like.                          | 0.72 | 0.81 | 1.81 | 3.05 | 0.99 | 2.22 | 5.26  | 9.08  |
| AK106598 | Epstein-Barr virus EBNA-1-like.              | 0.72 | 0.97 | 1.31 | 1.45 | 0.96 | 1.72 | 3.70  | 5.13  |
| AK065638 | Putative histone H1flk.                      | 0.88 | 0.75 | 0.79 | 1.31 | 0.92 | 2.39 | 3.42  | 5.61  |
| AK066981 | MAPK activating protein-like.                | 0.81 | 0.70 | 1.51 | 1.33 | 0.81 | 1.97 | 3.55  | 3.88  |
| AK100658 | Putative translation elongation factor       | 0.89 | 0.95 | 1.21 | 1.27 | 0.96 | 1.64 | 3.82  | 4.07  |
| AK105720 | Function unknown                             |      | 0.98 | 1.08 | 1.57 | 1.07 | 1.40 | 5.02  | 3.98  |
| AK106044 | probable amine oxidase                       | 0.86 | 0.72 | 1.00 | 1.61 | 0.99 | 1.16 | 3.81  | 3.90  |
| AK071047 | Putative senescence-associated-like protein  | 0.95 | 1.04 | 0.98 | 1.74 | 1.06 | 1.52 | 3.64  | 3.25  |
| AK105755 | NADH-dependent Glu synthase                  | 0.77 | 0.77 | 0.68 | 1.35 | 1.15 | 1.24 | 3.18  | 5.96  |
| AK100248 | Leucine zipper protein-like.                 | 0.98 | 1.29 | 1.08 | 1.16 | 0.96 | 2.12 | 7.61  | 2.54  |
| AK063558 | Lipase class 3 protein-like.                 | 0.90 | 0.99 | 1.36 | 1.22 | 0.94 | 1.51 | 3.69  | 4.07  |
| AK062189 | Putative glycolate oxidase                   | 0.98 | 1.02 | 1.36 | 1.47 | 1.11 | 1.43 | 5.08  | 4.18  |
| AK069864 | Putative male sterility 1 protein.           | 0.99 | 1.07 | 1.03 | 1.88 | 0.93 | 2.53 | 3.38  | 2.64  |
| AK069810 | MAD, mothers against decapentaplegic homolog | 1.01 | 1.03 | 1.32 | 1.45 | 1.11 | 1.81 | 3.89  | 3.43  |
| AK067907 | Fatty acidhydrolase                          | 0.80 | 1.70 | 2.08 | 3.00 | 1.02 | 8.20 | 40.92 | 32.81 |
| AK101060 | Bax inhibitor 1 (BI-1) (OsBI-1).             | 0.99 | 1.04 | 1.49 | 2.11 | 0.99 | 1.43 | 5.47  | 4.25  |

Median value are given.

Each values represents the ratio of avirulent strain-inoculated cells/water-treated cells
